# Supplementary material for: Revolutionary dual nanofiller embedded nanofiltration membranes: fabricated CQDs and PMO-PPD modified membranes for experimental design optimization of simultaneous removal of Pb(ii), MO, and NaCl from wastewater
Source: Royal Society of Chemistry journal article supplement (doi:10.1039/d4ew00871e), 2024-12-07
Supplement: d4ew00871e1.pdf [file d4ew00871e1.pdf]

**Revolutionary dual nanofillers embedded nanofiltration membranes: fabricated CQDs and PMO-PPD modified membranes for experimental design optimization of simultaneous removal of Pb(II), MO, and NaCl from wastewater**

Farzad Mehrjo<sup>1</sup>, Afsaneh Shahbazi<sup>2,\*</sup>

<sup>1</sup>Department of Water Sciences and Engineering, Faculty of Agriculture, Kashmar Higher Education Institute, Kashmar, Iran

<sup>2</sup>Environmental Sciences Research Institute, Shahid Beheshti University, 1983969411, Tehran, Iran

\*Corresponding Author: Tel: +982122431971; Fax: +982122431972

E-mail address: a\_shahbazi@sbu.ac.ir

**Table S1.** The list of chemicals used in this study.

| Chemical                                                     | Mw (g/mol) | Supplier          |
|--------------------------------------------------------------|------------|-------------------|
| Polyethersulfone (PES)                                       | 58000      | BASF, Germany     |
| Polyvinylpyrrolidone (PVP)                                   | 29000      | Merck, Germany    |
| Dimethylacetamide (DMAc)                                     | 87.12      | Merck, Germany    |
| Bovine serum albumin (BSA)                                   | 66430.3    | Merck, Germany    |
| P-123 surfactant                                             | 5800       | Merck, Germany    |
| Bis(triethoxysilyl)ethane (BTESE)                            | -          | Merck, Germany    |
| P-phenylenediamine (PPD)                                     | 108.14     | Merck, Germany    |
| Toluene (C <sub>7</sub> H <sub>8</sub> )                     | 92.141     | Merck, Germany    |
| Triethoxyvinylsilane (TEVS)                                  | 190.31     | Merck, Germany    |
| Acetonitrile (C <sub>2</sub> H <sub>3</sub> N)               | 41.05      | Merck, Germany    |
| Ethanol's (C <sub>2</sub> H <sub>5</sub> OH)                 | 46.07      | Merck, Germany    |
| Hydrochloric acid (HCl)                                      | 36.46      | Merck, Germany    |
| Bromine (Br)                                                 | 79.904     | Merck, Germany    |
| Sodium hydroxide (NaOH)                                      | 39.997     | Merck, Germany    |
| lead(II) nitrate (Pb(NO <sub>3</sub> ) <sub>2</sub> )        | 331.21     | Merck, Germany    |
| Citrate acid (C <sub>6</sub> H <sub>8</sub> O <sub>7</sub> ) | 192.10     | Merck, Germany    |
| Sodium chloride (NaCl)                                       | 58.44      | Merck, Germany    |
| Methyl orange (MO)                                           | 327.34     | Sigma-Aldrich, UK |

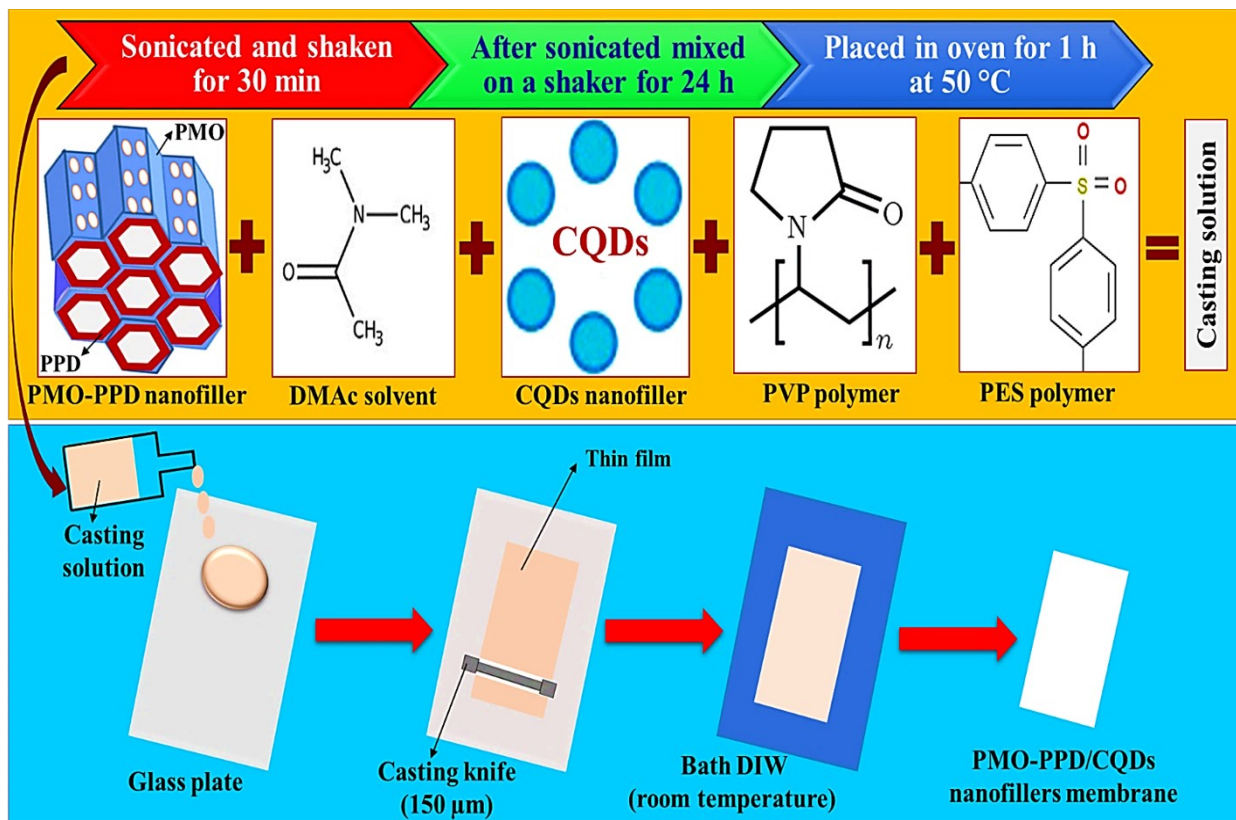

Fig. S1. Schematic of fabrication of the membrane NF using PMO-PPD/CQDs nanofillers

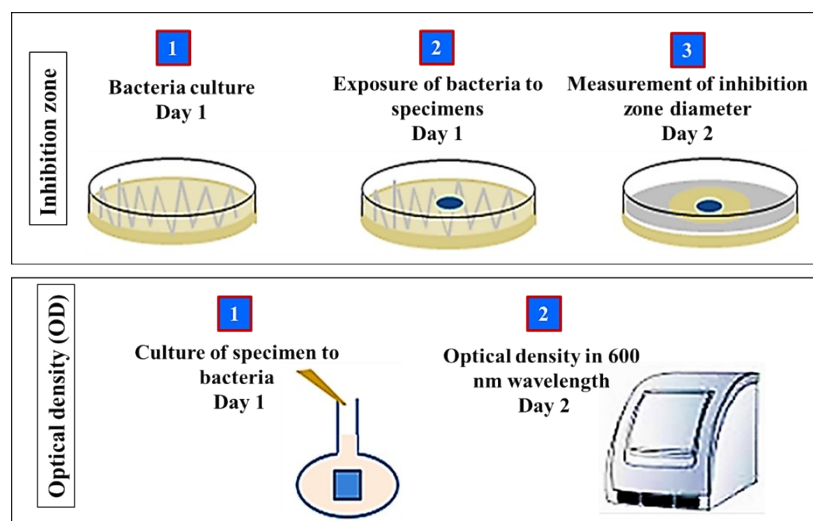

Fig. S2. A schematic of antibacterial test methods.

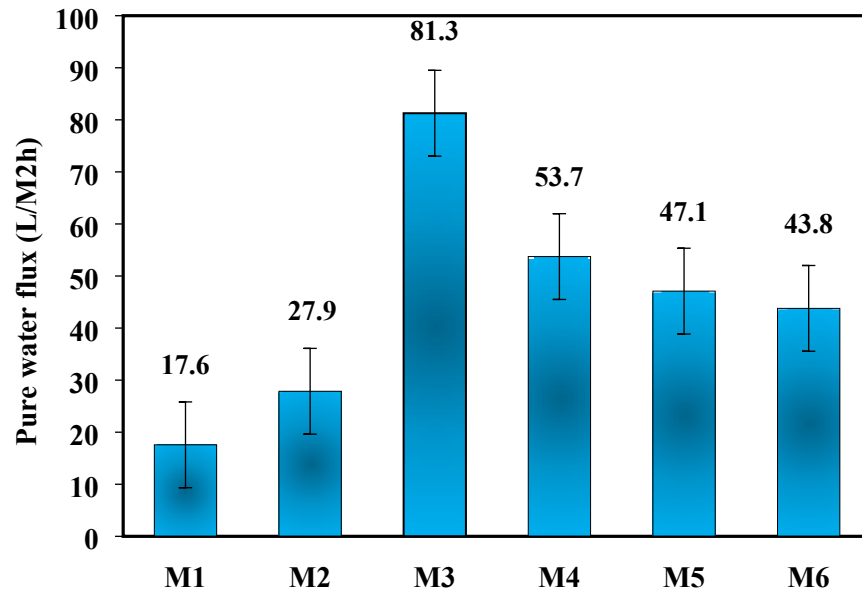

**Fig. S3.** The pure water flux of fabricated membranes.

**Table S2.** The contact angle and porosity of fabricated membranes.

| Membrane code | Contact angle (°) | Mean of pore size (nm) | Overall porosity (%) |
|---------------|-------------------|------------------------|----------------------|
| M1            | 63.00             | 3.68                   | 66.70±2.80           |
| M2            | 59.90             | 4.33                   | 69.60±2.60           |
| M3            | 46.60             | 5.91                   | 83.90±2.80           |
| M4            | 49.40             | 5.20                   | 79.90±2.50           |
| M5            | 53.20             | 5.13                   | 76.30±2.60           |
| M6            | 56.40             | 5.05                   | 74.00±2.30           |

**Table S3.** Statistical parameters gathered from the ANOVA analysis for the selected models.

| Response        | Model   | R <sup>2</sup> | Adj. R <sup>2</sup> | SD    | CV%  |
|-----------------|---------|----------------|---------------------|-------|------|
| Pb(II) removal% | Quartic | 0.9995         | 0.9994              | 0.071 | 0.14 |
| MO removal%     | Cubic   | 0.9404         | 0.8113              | 0.34  | 4.28 |
| NaCl removal%   | Quartic | 0.9996         | 0.9997              | 0.005 | 0.11 |
